# Supplementary material
Source: publisher figshare collection journal article supplement (https://brill.figshare.com/ndownloader/files/28543506)
Supplement: Supplementary file 1 [file 28543506]

## Sheet: Table S3
C = cocooned (0)	M= monomorphic (0)
N= Naked (1)	P = polymorphic (1)
* indicates favored rate in comparions
Strict Polymorphism
CP-> NP* vs. CN -> NM
7 parameter model						8 parameter model
Fit						Fit
	-lnL	AIC	AICc	N.traits	ntax		-lnL	AIC	AICc	N.traits	ntax
	-163.244	340.489	340.93	2	262		-158.788	333.576	334.145	2	262
Rates						Rates
	(0,0)	(0,1)	(1,0)	(1,1)			(0,0)	(0,1)	(1,0)	(1,1)
(0,0)	NA	0.00139373	0.00211999	NA		(0,0)	NA	0.00118782	0.000349078	NA
(0,1)	0.0145517	NA	NA	0.00211999		(0,1)	0.0129473	NA	NA	0.006259635*
(1,0)	0	NA	NA	0.00461821		(1,0)	0	NA	NA	0.00544286
(1,1)	NA	0.0015043	0.0300768	NA		(1,1)	NA	0.00145216	0.0378689	NA
NM-> NP* vs. NM-> CM
7 parameter model						8 parameter model
Fit						Fit
	-lnL	AIC	AICc	N.traits	ntax		-lnL	AIC	AICc	N.traits	ntax
	-177.576	369.152	369.593	2	262		-158.788	333.576	334.145	2	262
Rates						Rates
	(0,0)	(0,1)	(1,0)	(1,1)			(0,0)	(0,1)	(1,0)	(1,1)
(0,0)	NA	0.00212637	0.00251559	NA		(0,0)	NA	0.00118782	0.000349078	NA
(0,1)	0.0147211	NA	NA	0.00139646		(0,1)	0.0129473	NA	NA	0.00625964
(1,0)	0.00120512	NA	NA	0.00120512		(1,0)	0	NA	NA	0.005442862*
(1,1)	NA	0.00167508	0	NA		(1,1)	NA	0.00145216	0.0378689	NA
NP -> NM* vs. NM -> NP
7 parameter model						8 parameter model
Fit						Fit
	-lnL	AIC	AICc	N.traits	ntax		-lnL	AIC	AICc	N.traits	ntax
	-166.696	347.392	347.833	2	262		-158.788	333.576	334.145	2	262
Rates						Rates
	(0,0)	(0,1)	(1,0)	(1,1)			(0,0)	(0,1)	(1,0)	(1,1)
(0,0)	NA	0.00207508	0.00229468	NA		(0,0)	NA	0.00118782	0.000349078	NA
(0,1)	0.0151095	NA	NA	0.00147858		(0,1)	0.0129473	NA	NA	0.00625964
(1,0)	4.6983e-05	NA	NA	0.0024397		(1,0)	0	NA	NA	0.00544286
(1,1)	NA	0.00254902	0.0024397	NA		(1,1)	NA	0.00145216	0.0378689111*	NA
NP -> NM* vs. NP -> CP
7 parameter model						8 parameter model
Fit						Fit
	-lnL	AIC	AICc	N.traits	ntax		-lnL	AIC	AICc	N.traits	ntax
	-166.649	347.297	347.738	2	262		-158.788	333.576	334.145	2	262
Rates						Rates
	(0,0)	(0,1)	(1,0)	(1,1)			(0,0)	(0,1)	(1,0)	(1,1)
(0,0)	NA	0.00208107	0.00227479	NA		(0,0)	NA	0.00118782	0.000349078	NA
(0,1)	0.0152227	NA	NA	0.00159683		(0,1)	0.0129473	NA	NA	0.00625964
(1,0)	2.53608e-05	NA	NA	0.00248556		(1,0)	0	NA	NA	0.00544286
(1,1)	NA	0.00331927	0.00331927	NA		(1,1)	NA	0.00145216	0.0378689	NA
Variable Polymorphism
CP-> NP vs. CN -> NM
7 parameter model						8 parameter model
Fit						Fit
	-lnL	AIC	AICc	N.traits	ntax		-lnL	AIC	AICc	N.traits	ntax
	-183.097	380.194	380.635	2	262		-179.698	375.397	375.966	2	262
Rates						Rates
	(0,0)	(0,1)	(1,0)	(1,1)			(0,0)	(0,1)	(1,0)	(1,1)
(0,0)	NA	0.001478	0.00211978	NA		(0,0)	NA	0.00132949	0.000434226	NA
(0,1)	0.011913	NA	NA	0.00211978		(0,1)	0.0113111	NA	NA	0.00516085*
(1,0)	0	NA	NA	0.00572411		(1,0)	0	NA	NA	0.00640559
(1,1)	NA	0.00119371	0.0256191	NA		(1,1)	NA	0.00107181	0.0314665	NA
NM-> NP vs. NM-> CM
7 parameter model						8 parameter model
Fit						Fit
	-lnL	AIC	AICc	N.traits	ntax		-lnL	AIC	AICc	N.traits	ntax
	-201.496	416.992	417.433	2	262		-179.698	375.397	375.966	2	262
Rates						Rates
	(0,0)	(0,1)	(1,0)	(1,1)			(0,0)	(0,1)	(1,0)	(1,1)
(0,0)	NA	0.00209143	0.00261063	NA		(0,0)	NA	0.00132949	0.000434226	NA
(0,1)	0.0115601	NA	NA	0.0016914		(0,1)	0.0113111	NA	NA	0.00516085
(1,0)	0.00162815	NA	NA	0.00162815		(1,0)	0	NA	NA	0.00640568*
(1,1)	NA	0.00114986	0	NA		(1,1)	NA	0.00107181	0.0314665	NA
NP -> NM vs. NM -> NP
7 parameter model						8 parameter model
Fit						Fit
	-lnL	AIC	AICc	N.traits	ntax		-lnL	AIC	AICc	N.traits	ntax
	-186.102	386.204	386.645	2	262		-179.698	375.397	375.966	2	262
Rates						Rates
	(0,0)	(0,1)	(1,0)	(1,1)			(0,0)	(0,1)	(1,0)	(1,1)
(0,0)	NA	0.00198202	0.0022617	NA		(0,0)	NA	0.00132949	0.000434226	NA
(0,1)	0.0118744	NA	NA	0.0018095		(0,1)	0.0113111	NA	NA	0.00516085
(1,0)	2.44091e-05	NA	NA	0.00342961		(1,0)	0	NA	NA	0.00640559
(1,1)	NA	0.00195063	0.00342961	NA		(1,1)	NA	0.00107181	0.03146651*	NA
NP -> MN vs. NP -> CP
7 parameter model						8 parameter model
Fit						Fit
	-lnL	AIC	AICc	N.traits	ntax		-lnL	AIC	AICc	N.traits	ntax
	-186.34	386.68	387.122	2	262		-179.698	375.397	375.966	2	262
Rates						Rates
	(0,0)	(0,1)	(1,0)	(1,1)			(0,0)	(0,1)	(1,0)	(1,1)
(0,0)	NA	0.0019769	0.00227232	NA		(0,0)	NA	0.00132949	0.000434226	NA
(0,1)	0.0120277	NA	NA	0.00183126		(0,1)	0.0113111	NA	NA	0.00516085
(1,0)	2.76455e-06	NA	NA	0.00330705		(1,0)	0	NA	NA	0.00640559
(1,1)	NA	0.00298974	0.00298974	NA		(1,1)	NA	0.00107181	0.03146651*	NA
CP -> CM* vs. CM -> CP
7 parameter model						8 parameter model
Fit						Fit
	-lnL	AIC	AICc	N.traits	ntax		-lnL	AIC	AICc	N.traits	ntax
	-183.827	381.654	382.095	2	262		-179.698	375.397	375.966	2	262
Rates						Rates
	(0,0)	(0,1)	(1,0)	(1,1)			(0,0)	(0,1)	(1,0)	(1,1)
(0,0)	NA	0.00618449	0	NA		(0,0)	NA	0.00132949	0.000434226	NA
(0,1)	0.00618449	NA	NA	0.0158721		(0,1)	0.01131111*	NA	NA	0.00516085
(1,0)	0	NA	NA	0.0101513		(1,0)	0	NA	NA	0.00640559
(1,1)	NA	0	0.0505292	NA		(1,1)	NA	0.00107181	0.0314665	NA
NP -> NM* vs. CP -> CM
7 parameter model						8 parameter model
Fit						Fit
	-lnL	AIC	AICc	N.traits	ntax		-lnL	AIC	AICc	N.traits	ntax
	-182.793	379.585	380.026	2	262		-179.698	375.397	375.966	2	262
Rates						Rates
	(0,0)	(0,1)	(1,0)	(1,1)			(0,0)	(0,1)	(1,0)	(1,1)
(0,0)	NA	0.00178686	0.0007848	NA		(0,0)	NA	0.00132949	0.000434226	NA
(0,1)	0.0153047	NA	NA	0.0046423		(0,1)	0.0113111	NA	NA	0.00516085
(1,0)	0	NA	NA	0.00408185		(1,0)	0	NA	NA	0.00640559
(1,1)	NA	0.00159967	0.0153047	NA		(1,1)	NA	0.00107181	0.03146651*	NA
Metapleural Gland
C,NoMeta -> C,Meta* vs. C,Meta -> C,NoMeta
7 parameter model						8 parameter model
Fit						Fit
	-lnL	AIC	AICc	N.traits	ntax		-lnL	AIC	AICc	N.traits	ntax
	-68.7485	151.497	151.938	2	262		-63.3042	142.608	143.178	2	262
Rates						Rates
	(0,0)	(0,1)	(1,0)	(1,1)			(0,0)	(0,1)	(1,0)	(1,1)
(0,0)	NA	0.00250869	0.0857205	NA		(0,0)	NA	0.0298135*	0.0161029	NA
(0,1)	0.00250869	NA	NA	0		(0,1)	0	NA	NA	0.000467698
(1,0)	0	NA	NA	0.180294		(1,0)	0.0263154	NA	NA	0.0462445
(1,1)	NA	0.000164451	0	NA		(1,1)	NA	0	0	NA
N,NoMeta -> N,meta* vs. N,Meta -> N,NoMeta
7 parameter model						8 parameter model
Fit						Fit
	-lnL	AIC	AICc	N.traits	ntax		-lnL	AIC	AICc	N.traits	ntax
	-69.0093	152.019	152.46	2	262		-63.3042	142.608	143.178	2	262
Rates						Rates
	(0,0)	(0,1)	(1,0)	(1,1)			(0,0)	(0,1)	(1,0)	(1,1)
(0,0)	NA	0.0600287	49.9992	NA		(0,0)	NA	0.0298136	0.0161029	NA
(0,1)	0.00117707	NA	NA	0.00203721		(0,1)	0	NA	NA	0.000467698
(1,0)	100	NA	NA	0		(1,0)	0.0263154	NA	NA	0.04624454*
(1,1)	NA	0.000211553	0	NA		(1,1)	NA	0	0	NA
